# Supplementary material
Source: publisher figshare collection journal article supplement (https://frontiersin.figshare.com/ndownloader/files/28217646)
Supplement: Supplementary file [file 28217646]

Table 1

| location     |                                                                | kinase                    | methods                         | reference                 | effects                                    |
|--------------|----------------------------------------------------------------|---------------------------|---------------------------------|---------------------------|--------------------------------------------|
| <b>NTD</b>   | S8                                                             | casein kinase II          | M/S predicted                   | (Shibata et al., 2013)    | ?                                          |
|              | S128<br>S250*<br>T159                                          | CDK5                      | M/S mutations                   | (Kino et al., 2010)       | regulates transcriptional activity         |
|              | S196<br>S227<br>S238<br>S287<br>S361*                          | ERK1/2                    | mutations antibody              | (Faresse et al., 2012)    | regulates MR transactivation and stability |
|              | S129<br>S183<br>S250*<br>S259<br>S274<br>S283<br>S299<br>S361* | proline-directed kinases  | M/S predicted                   | (Shibata et al., 2013)    | ?                                          |
|              | S311<br>S424                                                   | ??                        | M/S predicted                   | (Shibata et al., 2013)    | ?                                          |
|              | S255<br>S262                                                   | glykogen synthase kinase3 | M/S predicted                   | (Shibata et al., 2013)    | ?                                          |
|              | S543                                                           | CAMKII                    | M/S predicted                   | (Shibata et al., 2013)    | ?                                          |
|              | S459                                                           | CK2                       | peptide array mutation          | (Ruhs et al., 2017)       | influences MR-DNA interaction              |
|              | S601                                                           | PKA or casein kinase I    | mutation                        | (Walther et al., 2005)    | affects intracellular localization of MR   |
|              | ??                                                             | PKCδ                      | antibody                        | (Lu et al., 2019)         | affects MR transactivation                 |
| <b>hinge</b> | S703                                                           | proline-directed kinase   | M/S predicted                   | (Shibata et al., 2013)    | ?                                          |
| <b>LBD</b>   | T735<br>S737                                                   |                           | M/S                             | (Hirschberg et al., 2004) | ?                                          |
|              | ??                                                             | PKCa                      | antibodies                      | (Le Moellic et al., 2004) | affects MR transactivation                 |
|              | S843                                                           | ULK1                      | M/S Mutation<br>S843-P-antibody | (Shibata et al., 2013)    | affects ligand binding                     |
